# Supplementary material
Source: MDPI journal article supplement (https://www.mdpi.com/2227-9717/12/5/1020)
Supplement: s1 [file s1]

## Supplementary Materials:

### Structures of phenolic compounds

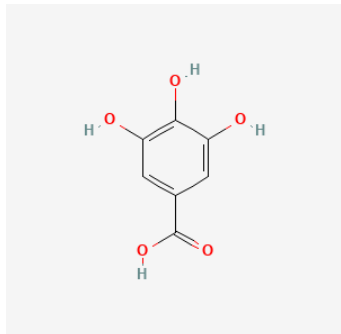

a) Gallic acid

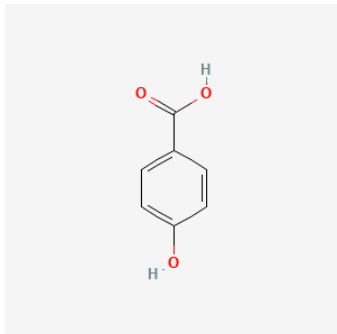

b) *p*-hydroxybenzoic acid

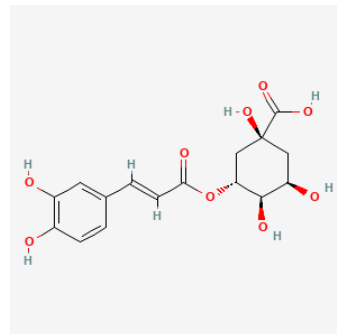

c) Chlorogenic acid

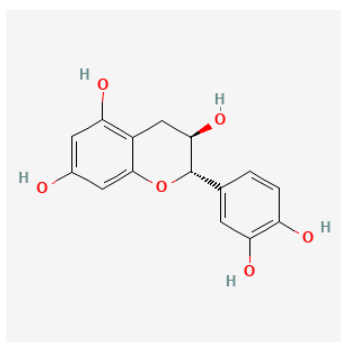

d) Catechin

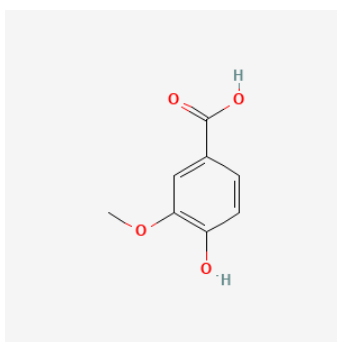

e) Vanillic acid

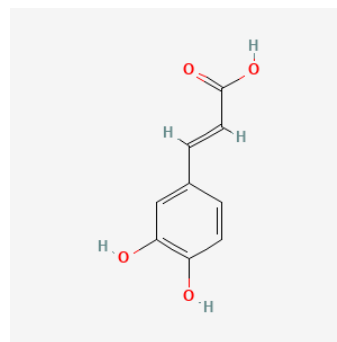

f) Caffeic acid

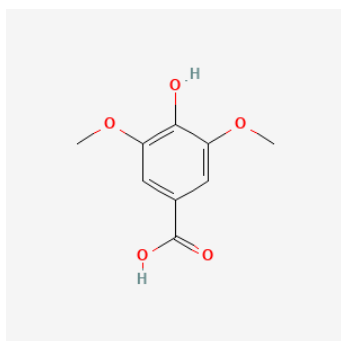

g) Syringic acid

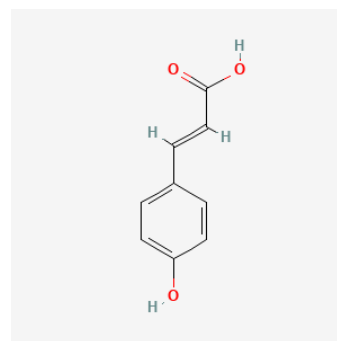

h) *p*-coumaric acid

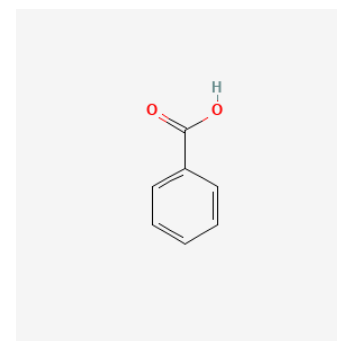

i) Benzoic acid

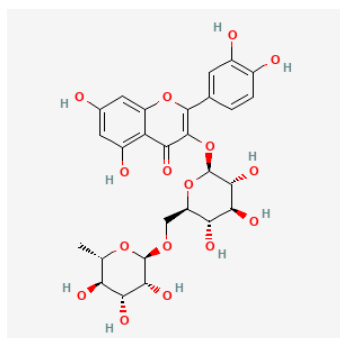

j) Rutin

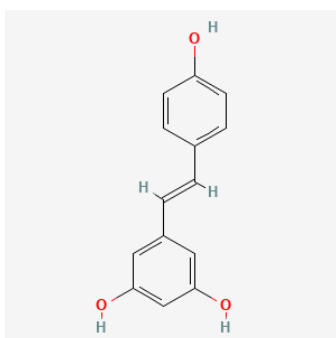

k) Resveratrol

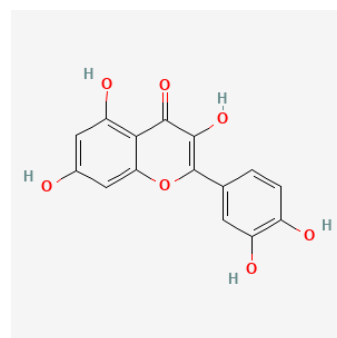

l) Quercetin

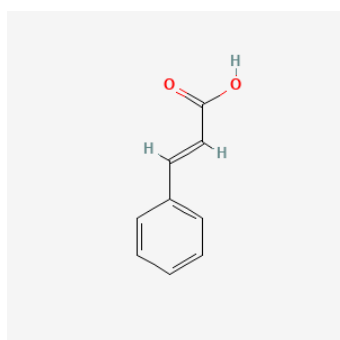

m) Cinnamic acid

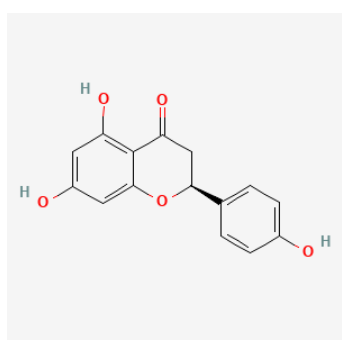

n) Naringenin

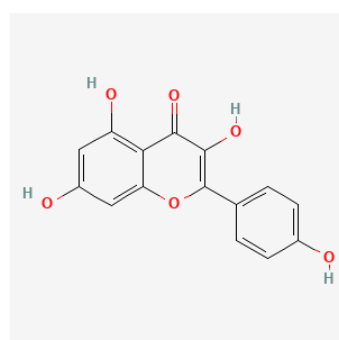

o) Kaempferol

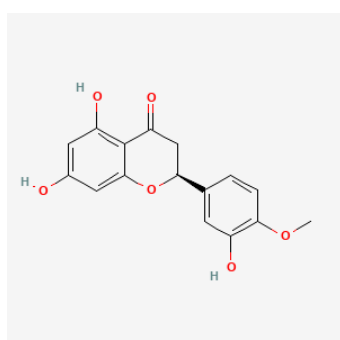

p) Hesperetin

**Figure S1.** Structures of analyzed phenolic compounds (a–p).

## Structures of anthocyanins

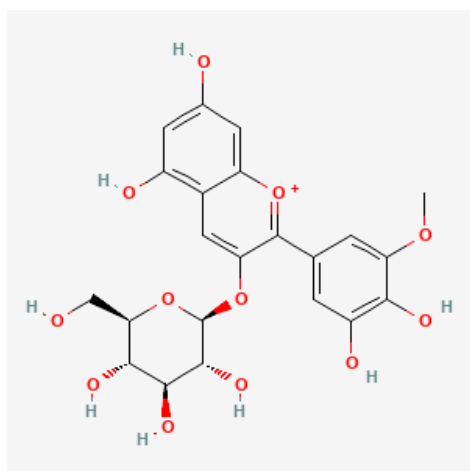

a) Delphinidin- 3-O-glucoside

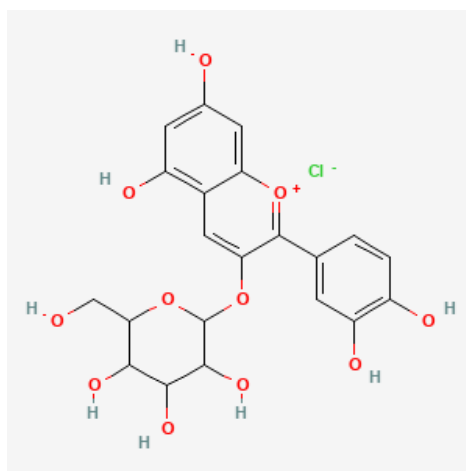

b) Cyanidin 3-O-glucoside

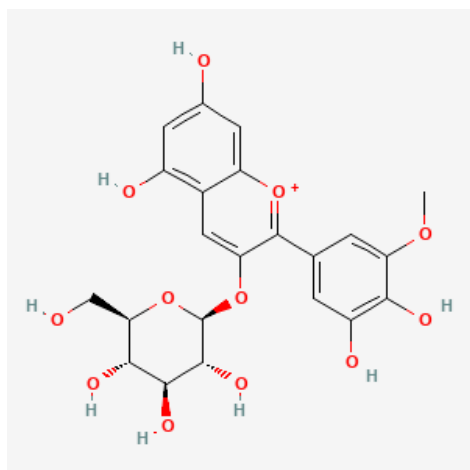

c) Petunidin- 3-O-glucoside

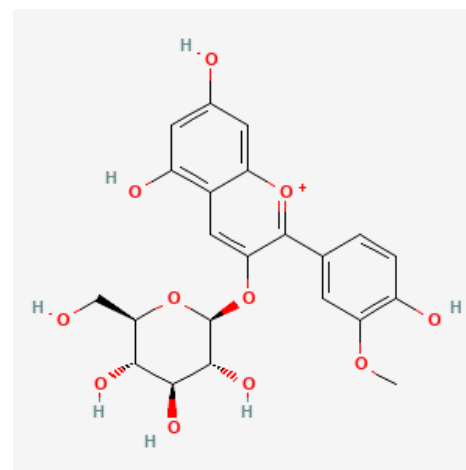

d) Peonidin- 3-O-glucoside

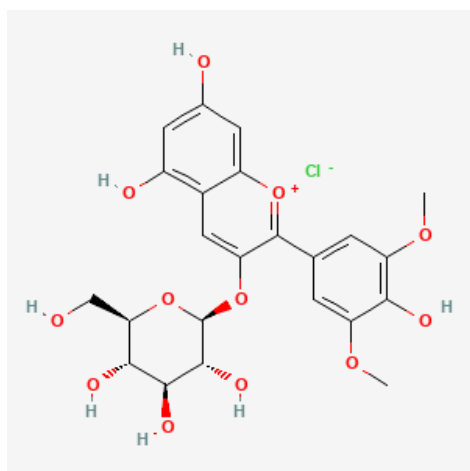

e) Malvidin- 3-O-glucoside

**Figure S2.** Structures of analyzed anthocyanins (a–e).
